# Supplementary material for: Immune signature of the Chlamydia vaccine CTH522/CAF®01 translates from mouse to human and induces durable protection
Source: Research Square preprint supplement (doi:10.21203/rs.3.rs-3095572/v1), 2023-07-06
Supplement: Supplementary file 1 [file 963443129ba37365a19277ed.xlsx]

## Sheet: Fig. 1c+e
Figure 1
Fig. 1c
IFN-g release (pg/ml)
CTH522	84406.3	17951	44044	1073303	29488	14630.3	93729.7	23635	117076
Control	0.5	1.21333	0.5	0.5	0.5	0.5	11	50	1.66667	68.6667
IL-17A release (pg/ml)
CTH522	3298.94	411.72	2701.44	44194.2	873.003	230.073	919.287	566.21	1559.87
Control	0.5	0.5	0.5	0.5	0.5	0.5	0.5	0.5	0.5	0.5
Fig. 1e
IFN-g release (pg/ml)
CTH523	58963.3	16831	25490	366693	29117	11545.3	108800	17256	73969
Control	0.5	1.21333	0.5	0.5	0.5	0.5	2.33333	12	0.5	19.6667
CTH518	17214.3	4560	13494	356107	3636	4951.33	9045.67	9281	42433
Control	0.5	17.0133	0.5	0.5	0.5	0.5	0	0.5	1.33333	0.5

## Sheet: Fig. 1d+f
Figure 1
Fig. 1d
IFN-g release (pg/ml)
CTH522	2036	1242	476	3359	2397.99	1299.16	448	178	2097.82	1296	2424	863	1410
Control	15	168.82	0.5	69	117.37
IL-17A release (pg/ml)
CTH522	87	9	0.5	22	18.56	89.85	6.24	40.07	67.99	151.92	42.44	9.09	1.14
Control	0.5	0.5	0.5	4.71544	0.5
Fig. 1f
IFN-g release (pg/ml)
CTH523	1498	489	40	3304	1295.62	1009.48	212	11	1024.34	434	1422	278	896
Control	0.5	1342.82	0.5	0.5	0.5
CTH518	372	270	0.5	1329	132.64	620.428	1	15	959.156	110	769	67	211
Control	0.5	0.5	3	0.5	0.5

## Sheet: Fig. 1g
Figure 1
Fig. 1g
Mouse peptide specific IFN-g responses (pg/ml)									% human responders with peptide IFN-g response>170 pg/ml
P4D	0.5	0.5	17.1667	74.9	0.5	39.5			P4D	40
P5D	0.5	0.5	17.1667	74.4	0.5	24.5			P5D	30
P6D	0.5	0.5	0.5	68.9	0.5	19			P6D	20
P7D	212.622	488.553	142.472	24841.9	9.9	29			P7D	10
P8D	25602.7	15969.4	2133.3	4942.4	0.9	9678			P8D	10
P9D	0.5	0.5	47.6667	329.9	0.5	45			P9D	10
P10D	0.5	0.5	0.5	1.9	0.5	24			P10D	50
P11D	99.1667	0.5	0.5	49.4	1.9	24.5			P11D	40
P12D	0.5	0.5	1.66667	12.4	0.5	105.5			P12D	0
P13D	0.5	0.5	0.5	0.5	0.5	55.5			P13D	30
P14D	156.167	0.5	0.5	12.4	0.5	29.5			P14D	0
P15D	0.5	0.5	0.166665	0.5	0.5	45			P15D	30
P16D	7294.12	251274	6122.44	2525.9	1928.9	2268.5			P16D	30
P17D	5609.52	5187.09	3149.5	7779.9	12247.9	10623.5			P17D	30
P18D	0.5	0.5	0.5	120.9	0.9	61			P18D	10
P19D	116.667	0.5	463.167	528.4	249.4	120.5			P19D	60
P20D	693.167	0.5	350.167	164.9	8.4	104			P20D	60
P21D	0.5	0.5	20.6667	52.9	0.5	25			P21D	10
P22D	0.5	0.5	0.5	42.4	0.5	40.5			P22D	20
P23D	0.5	258.334	60.1667	42.4	0.5	71.5			P23D	30
P24D	0.5	0.5	5.16667	41.9	0.5	14			P24D	20
P25D	8810.55	17931.2	1223.59	5104.9	5008.4	10018.5			P25D	30
P26D	2.16667	0.5	15.6667	631.9	0.5	24.5			P26D	10
P27D	0.5	0.5	5.66667	6.9	0.5	19			P27D	10
P28D	1031.11	36045	373.322	128.9	54.9	2552			P28D	20
P29D	227.492	230226	1661.9	57.9	477.9	3001.5			P29D	20
P30D	15285.3	11294.5	2031.25	5577.4	851.9	9388			P30D	40
P31D	0.5	0.5	0.5	0.5	0.5	25			P31D	10
P32D	118.667	0.5	4.66667	0.5	0.5	3.5			P32D	30
P30E	13532	13866.8	2210.4	6255.9	976.4	5727.5			P30E	30
P31E	0.5	0.5	6.16667	0.5	0.5	6.5			P31E	20
P27F	0.5	0.5	0.166665	0.5	0.5	1			P27F	40
P28F	0.5	0.5	1628.67	188.9	0.5	5			P28F	60
P29F	3820.7	7541.76	223.587	2774.9	75.4	578.5			P29F	20
P30F	9436.01	12673.9	2232.1	1898.4	1131.9	8984			P30F	40
P31F	0.5	0.5	93.1667	0.5	0.5	1.5			P31F	20
P32F	0.5	0.5	12.1667	0.5	0.5	2			P32F	10
P27G	423.667	0.5	78.1667	238.9	0.5	9			P27G	20
P28G	0.5	0.5	416.667	577.9	0.5	317.5			P28G	50
P29G	0.5	0.5	41.1667	44.4	0.5	1			P29G	10
P30G	331.167	0.5	54.1667	919.4	0.5	2715.5			P30G	0
P31G	0.5	0.5	57.1667	0.5	0.5	2			P31G	10
P32G	319.667	0.5	0.5	0.9	18.9	0.5			P32G	30

## Sheet: Fig. 2a+b
Figure 2
Fig. 2a	Surface specific IgG		AUC
CTH522 vaccinated group
SvD	11375	5249	16482	28487	20108	5534	555	8856	107	3531	75	53	18130	566	47234	14725
SvE	10517	654	5300	29530	9078	756	109	13961	50	1084	93	45	6504	191	6806	14857
SvF	9946	8151.41	10567	8903.38	10529.9	2087.6	341.541	6805.69	20259.1	10107.9	217.384	133	16121	454.138	59621.9	5661.39
SvG	5032	2876	6974	10190	8308	777	330	9178	10275	6560	170	120	10310	393	106668	5009
Control group
SvD	30	32	9	22	14	54	70	26	19	95	27	59	74	22	21	29
SvE	93	87	30	71	38	158	197	64	36	222	58	149	254	59	62	81
SvF	44	38.3012	12.3999	35.3883	23.2024	60	37	21.4284	15.9693	95.3726	48.0622	13.9821	206.081	53.4584	71.2456	95
SvG	58	37	25	25	50	30	111	63	45	109	44	141	83	49	41	74
Fig. 2b	Surface specific IgG		AUC
CTH522 vaccinated group
SvD	822	3735	10876	2409	8527	1515	620	2138	2758	7934	1706	2639	954	623
SvE	779	3629	16298	1939	8149	1333	609	1715	1788	7900	1815	2062	890	591
SvF	1064	4145	7706	3803	9279	2468	996	2578	3304	3517	3575	2407	1361	719
SvG	1028	4657	5907	3460	9299	2312	756	2250	1633	3267	2433	2066	1068	704
Control group
SvD	429	236	3579	281	522	519	402	1184	183	614	158	119	608	734
SvE	542	272	4308	261	619	919	383	1042	171	705	188	162	696	778
SvF	682	389	6503	464	1096	1189	583	2453	273	883	342	217	1315	1293
SvG	445	420	3630	295	757	873	368	1678	167	629	226	157	915	938

## Sheet: Fig. 2 c+d
Figure 2
Fig. 2a	Surface specific IgG		AUC
CTH522 vaccinated group
SvD	11375	5249	16482	28487	20108	5534	555	8856	107	3531	75	53	18130	566	47234	14725
SvE	10517	654	5300	29530	9078	756	109	13961	50	1084	93	45	6504	191	6806	14857
SvF	9946	8151.41	10567	8903.38	10529.9	2087.6	341.541	6805.69	20259.1	10107.9	217.384	133	16121	454.138	59621.9	5661.39
SvG	5032	2876	6974	10190	8308	777	330	9178	10275	6560	170	120	10310	393	106668	5009
Control group
SvD	30	32	9	22	14	54	70	26	19	95	27	59	74	22	21	29
SvE	93	87	30	71	38	158	197	64	36	222	58	149	254	59	62	81
SvF	44	38.3012	12.3999	35.3883	23.2024	60	37	21.4284	15.9693	95.3726	48.0622	13.9821	206.081	53.4584	71.2456	95
SvG	58	37	25	25	50	30	111	63	45	109	44	141	83	49	41	74
Fig. 2b	Surface specific IgG		AUC
CTH522 vaccinated group
SvD	822	3735	10876	2409	8527	1515	620	2138	2758	7934	1706	2639	954	623
SvE	779	3629	16298	1939	8149	1333	609	1715	1788	7900	1815	2062	890	591
SvF	1064	4145	7706	3803	9279	2468	996	2578	3304	3517	3575	2407	1361	719
SvG	1028	4657	5907	3460	9299	2312	756	2250	1633	3267	2433	2066	1068	704
Control group
SvD	429	236	3579	281	522	519	402	1184	183	614	158	119	608	734
SvE	542	272	4308	261	619	919	383	1042	171	705	188	162	696	778
SvF	682	389	6503	464	1096	1189	583	2453	273	883	342	217	1315	1293
SvG	445	420	3630	295	757	873	368	1678	167	629	226	157	915	938

## Sheet: Fig. 2e
Figure 2
Fig. 2e	Peptide responses (Abs) with background subtraction
CTH522 peptides	CTH522 vaccinated human participants (n=14)
P4D	0.011917	0.023583	0.213	0.015167	0.114833	0.04925	0.013167	0.101	0.104667	-0.02333	0.0475	0.054333	0.140667	0.013167
P5D	-0.03175	-0.05175	0.049	-0.00983	0.0045	-0.02475	-0.02183	0.056667	0.021333	-0.053	0.0585	0.001	0.046667	-0.01417
P6D	1.75192	0.108583	0.061333	0.568833	1.8585	1.25325	0.569167	0.825333	0.911667	0.005333	0.075833	0.056	1.34433	0.146833
P7D	1.11592	0.22425	0.053	0.0945	1.2515	0.161917	0.198833	0.141667	0.358	0.183667	0.6015	0.082667	0.382	0.0265
P8D	0.993917	0.364917	0.071667	0.146833	1.86183	0.76925	0.038167	0.767667	0.983333	0.061	0.554167	0.407	0.071333	0.167167
P9D	0.03925	0.01125	0.071333	0.0255	0.078167	-0.01342	0.006833	0.333333	0.139	0.017333	0.0655	0.037333	0.162667	0.065833
P10D	-0.02708	-0.00408	0.066667	0.008167	0.013833	-0.01975	0.059833	0.027	0.049	-0.00433	0.084833	0.031333	0.171667	0.010833
P11D	-0.00342	-0.01975	0.033667	0.0365	0.037167	-0.01542	0.057167	0.059333	0.124	0.002667	0.0515	0.042333	0.122	0.003167
P12D	-0.02308	-0.01542	0.240333	0.005833	0.015833	-0.03242	0.010833	0.021	0.048667	-0.003	0.039167	0.032667	0.040333	0.026833
P13D	-0.02575	0.00225	0.121	0.002833	0.006833	-0.02675	-0.00283	-0.02367	0.029333	-0.02167	0.0195	0.017	0.020667	0.002833
P14D	-0.02108	0.009583	0.214	0.011167	0.0325	-0.01742	-0.0015	-0.001	0.001667	-0.03433	-0.0095	-0.003	0.006	-0.01283
P15D	-0.00908	0.046583	0.081667	0.020833	0.060167	0.03725	0.0075	0.039333	0.080333	0.005667	0.065833	0.019333	1.959	0.008833
P16D	-0.00742	0.011583	0.091333	0.0125	0.052167	-0.01075	0.0015	-0.03833	0.017	-0.053	0.0125	0.011833	0.722333	-0.02483
P17D	-0.02942	-0.03008	0.029667	-0.0005	0.0135	-0.03308	-0.0075	-0.05467	-0.02833	-0.07967	-0.01883	0.0065	-0.00867	-0.03817
P18D	-0.03308	-0.04075	0.090667	-0.00683	-0.01183	-0.05008	-0.01317	-0.05633	-0.024	-0.079	-0.0245	0.2185	-0.01967	-0.03717
P19D	-0.02675	-0.01575	0.138667	0.004167	0.015167	-0.03808	0.111833	-0.05233	-0.009	-0.074	-0.01117	0.0505	-0.00933	-0.02883
P20D	-0.01942	-0.00042	0.026333	0.006833	0.023833	-0.03342	0.144833	-0.03833	-0.014	-0.073	-0.0225	0.048833	0.069	-0.0295
P21D	0.74025	0.234583	0.05	0.526167	1.35117	0.143917	0.540833	1.377	1.119	0.296	0.0165	0.197167	0.391	0.1125
P22D	0.90425	0.745917	0.234667	0.484833	1.0145	1.80658	0.469167	1.415	1.26233	0.258	0.525833	0.051167	1.107	0.1395
P23D	0.054583	0.727917	-0.01833	0.1815	0.3835	0.105583	0.139833	1.54333	0.255	-0.02533	0.539833	0.030167	0.819667	0.047167
P24D	-0.02442	-0.00375	-0.01567	0.009167	0.0325	-0.03142	0.0055	-0.05233	-0.031	-0.07333	-0.03717	0.033833	-0.02	-0.0305
P25D	-0.02542	-0.01142	-0.02	0.006167	0.0205	-0.02375	0.0125	-0.06033	-0.02367	-0.08133	-0.03617	0.0915	-0.01233	-0.0415
P26D	-0.00942	-0.02608	-0.01867	0.0165	0.014833	0.116583	0.005167	-0.04033	-0.017	-0.064	-0.0365	0.206833	0.008	-0.0355
P27D	0.05225	0.028917	0.004333	0.012833	0.077167	0.001917	0.0245	0.019	-0.004	-0.04933	0.017167	0.0135	0.019667	0.005167
P28D	0.032524	0.213	0.0605	0.056904	0.203524	0.057881	0.068262	0.8575	0.182333	0.045417	0.035333	-0.00417	1.05008	-0.03367
P29D	0.11419	0.049	0.017833	0.116571	0.110857	0.053881	0.104929	0.107833	0.26	0.086083	1.38867	-0.01167	0.118417	-0.081
P30D	0.248524	0.061333	0.172167	0.139904	0.70619	0.238214	0.089929	1.15283	2.00967	0.211083	2.591	-0.017	1.51308	0.026
P31D	0.014524	0.053	0.029833	0.011571	0.090524	0.033547	0.024596	0.065167	0.036333	0.039417	0.738333	0.195	0.10975	-0.029
P32D	0.016524	0.071667	0.1165	0.009904	0.029524	0.083881	0.031929	0.0545	0.047	0.03375	0.054333	0.027	0.046083	-0.04433
P30E	0.34019	0.071333	0.024167	0.147904	0.83719	0.275881	0.105596	1.2995	2.00467	0.226083	2.411	0.025333	1.36308	0.048333
P31E	0.031857	0.066667	0.033167	0.013571	0.064857	0.079214	0.026596	0.045833	0.034333	0.018417	0.185667	0.173667	0.161083	-0.05567
P27F	0.055857	0.033667	0.004167	0.007904	0.062857	0.027214	0.041929	0.119167	0.049333	0.039083	0.028667	0.027667	0.031417	-0.089
P28F	0.016524	0.240333	0.018833	0.049904	0.188524	0.084881	0.097596	0.843833	0.18	0.078083	0.039333	0.006667	0.94475	-0.059
P29F	0.355524	0.121	0.033167	0.283238	0.15919	0.306881	0.023929	0.452167	0.349333	0.09675	0.008	0.010333	0.003417	-0.07467
P30F	0.54619	0.214	0.0355	0.444238	1.39686	0.529547	0.126929	1.0745	2.14033	0.327083	1.37033	0.068	1.00342	0.040333
P31F	0.027857	0.081667	0.0445	0.035238	0.12319	0.043881	0.038929	0.105167	0.019667	0.041417	0.031667	0.183333	0.013417	-0.048
P32F	0.003857	0.091333	0.047167	0.009571	0.01719	0.032881	0.009596	-0.0195	-0.00267	-0.00858	0.001667	-0.00083	0.016083	-0.07833
P27G	0.04119	0.029667	0.011833	0.001571	0.056524	0.016547	0.037262	-0.02717	-0.02167	-0.03392	-0.03867	-0.0065	-0.03458	-0.11133
P28G	0.00319	0.090667	0.0045	0.016571	0.066857	0.027881	0.040262	0.770833	0.043667	-0.00692	-0.034	-0.0035	1.08475	-0.1
P29G	0.375524	0.138667	0.015833	0.265571	0.14819	0.275881	0.023262	0.4315	0.366667	0.053417	-0.03067	0.067167	-0.00125	-0.09533
P30G	0.687533	0.338443	0.222967	0.678933	1.43076	0.861975	0.159496	0.983833	1.692	0.162417	1.07367	0.1765	0.820417	-0.0173333
P31G	0.011857	0.05	0.175833	0.014904	0.07519	0.041547	0.025596	-0.03583	-0.026	-0.03558	-0.042	-0.0065	-0.03692	-0.10633
P32G	0.003857	0.234667	0.2375	0.014904	0.021524	0.057547	0.014596	-0.03117	-0.02233	-0.03758	-0.036	-0.0065	-0.00058	-0.115
CTH522 peptides	CTH522 vaccinated mice (n=16)
P4D	0.273	0.036	0.1155	0.6545	0.0765	0.037	0.0615	0.052	0.04	0.062	0.053	0.0625	0.092	0.037	0.048	0.0365
P5D	0.12	0.0075	0.007	0.223	0.0445	0.0585	0.0205	0.089	0.008	0.057	0.2935	0.156	0.0315	0.024	0.014	0.091
P6D	3.0315	1.716	2.8655	1.027	2.021	2.773	2.674	2.0045	2.375	2.511	1.8465	0.8625	2.6385	2.4485	2.3275	0.7295
P7D	0.886	0.0135	0.1775	0.0685	0.0255	0.0055	0.15	0.2185	0.0035	2.4815	0.0295	0.0065	1.432	0.055	1.535	0.031
P8D	3.1655	1.8355	2.8085	2.9725	3.3855	2.9995	3.004	3.0765	0.562	3.239	2.801	2.756	2.939	3.084	2.6135	2.978
P9D	1.477	0.112	0.4445	1.2555	2.695	0.548	0.753	1.969	0.013	0.897	0.1555	0.28	0.5835	0.83	0.4385	0.8715
P10D	0.1055	0.0245	0.153	1.208	0.0235	0.016	0.003	0.02	0.012	0.2285	0.0155	0.045	0.062	0.222	0.017	0.324
P11D	1.8885	0.3025	1.1385	0.4515	0.5965	0.011	0.0115	0.102	0.019	1.0895	0.0055	0.2515	0.206	0.097	-0.002	0.0035
P12D	0.4425	0.054	0.3825	0.023	0.0095	0.006	0.2	0.049	0.0125	0.0125	0.0105	0.313	0.2345	0.0055	0.0055	0.235
P13D	0.2935	0.4385	-0.001	0.5615	0.721	0.0055	0.2295	0.012	0.011	1.0235	0.0125	0.2645	0.24	0.028	0.013	0.0665
P14D	0.1115	0.066	-0.002	0.1005	0.0015	0.0075	0.007	0	0.001	0.0055	0.003	0.028	0.0135	-0.0005	-0.002	0.003
P15D	0.0585	0.0015	0.095	-0.0005	0.0425	0.0105	-0.0065	0.005	0.0015	0.1145	0.234	0.004	1.541	0.0045	0.0075	-0.001
P16D	0.056	0.002	0.009	0.0145	0.07	0.006	-0.004	0	0.0035	0.065	0.003	0.0035	0.4175	0.012	0.0015	-0.0005
P17D	0.272	0.008	0.008	0.011	0.0205	0.013	0.0065	0.0215	0.009	0.0115	0.012	0.0115	0.0215	0.017	0.0155	0.006
P18D	0.228	0.005	-0.0015	0.014	0.002	0.0065	0.002	0.0075	0.01	-0.004	0.012	0.0015	0.013	0.0395	0.0085	-0.0055
P19D	0.0485	0.3065	-0.001	0.2635	0.4885	0.0085	-0.006	0.002	0.004	-0.0065	0.0275	0.003	0.506	0.0065	0.0235	-0.0035
P20D	0.085	0.0085	0.0015	0.0365	0.005	0.008	0.0025	0.229	0.0075	0.247	0.006	0.005	0.0195	0.0075	0.006	-0.0005
P21D	0.058	0.009	0.013	0.6305	0.49	0.016	0.0115	0.0125	0.0445	0.027	0.0165	0.0125	0.286	0.0255	0.018	0.016
P22D	0.167	0.012	0.1775	1.047	0.272	0.0145	0.0005	0.008	0.4745	2.69	0.053	0.013	0.207	0.3615	0.015	0.0045
P23D	0.037	0.0245	0.0245	1.438	0.1535	0.6975	0.0005	0.0105	2.3875	0.016	0.204	0.009	0.3735	0.096	1.182	-0.004
P24D	0.055	0.0035	0.012	0.279	0.0795	0.0295	0.017	0.0125	0.836	0.011	0.0275	0.006	0.0425	0.0105	0.101	0.0015
P25D	0.1055	0.0095	0.0155	0.2955	0.0635	0.0115	0.009	0.012	0.01	0.024	0.0145	0.0145	0.229	0.017	0.053	0.0085
P26D	1.4525	0.015	0.011	0.267	0.025	0.0415	0.06	0.0215	0.027	1.0485	0.026	0.434	0.0485	0.9415	1.4325	2.4455
P27D	1.3875	0.0095	0.018	0.0295	0.0125	0.0225	0.021	0.018	0.016	0.1155	0.043	0.028	0.041	0.143	0.16	0.792
P28D	2.7155	0.0055	0.0665	0.3105	0.9215	0.0045	0.001	0.007	0.0155	0	0.0065	0.019	1.664	0.2505	0.013	0.443
P29D	1.652	0.0075	1.9595	0.9555	0.2605	0.047	0.0155	0.008	0.009	0.232	0.007	0.0775	1.3425	1.636	2.953	0.003
P30D	2.2515	0.8565	3.046	2.9865	2.4405	1.325	0.022	2.6715	0.075	1.5775	0.041	0.0475	2.672	0.468	2.9105	2.228
P31D	0.0055	0.0005	-0.002	-0.001	-0.001	0.0035	-0.0055	0.079	0.0005	0.0045	0.0015	0.0005	0.0015	-0.0015	0.0015	-0.0025
P32D	0.089	0.004	1.0135	1.4275	0.605	0.0075	-0.002	0.1585	0.0045	0.745	0.008	0.2095	0.026	0.02	0.0645	0.9985
P30E	2.2325	0.745	2.7415	2.837	2.339	1.2655	0.01	2.5905	0.0685	1.544	0.033	0.0445	2.628	0.0505	2.829	2.2035
P31E	0.0185	-0.0015	-0.008	-0.005	-0.003	0.0015	-0.008	-0.001	-0.0015	0.0045	-0.0005	-0.0015	-0.0015	0.0005	-0.0015	-0.0045
P27F	1.3655	0.01	0.019	0.025	0.012	0.0175	0.0165	0.023	0.0175	0.1385	0.0485	0.0315	0.0345	0.1845	0.161	0.911
P28F	1.3565	0.005	0.002	0.939	0.646	0.099	0.2025	0.005	0.007	0.01	0.006	0.007	0.3015	0.169	0.0055	2.634
P29F	0.0815	0.004	0.03	0.1025	0.005	0.0085	-0.0005	0.002	0.0055	0.1635	0.005	0.006	2.364	0.0065	0.0065	0.0045
P30F	3.016	2.709	3.2	3.056	3.0395	2.764	1.118	2.6905	2.9285	2.9265	0.4985	0.3805	3.179	1.283	3.184	2.854
P31F	0.128	0.003	0.001	0.0025	-0.001	0.001	0.0195	0.02	0.0035	0.0135	0.0005	0.007	-0.001	-0.002	-0.0035	-0.004
P32F	0.091	0.0065	1.9335	2.404	1.636	0.005	-0.001	0.008	0.0065	0.763	0.009	0.595	0.11	0.0075	0.457	2.586
P27G	1.2805	0.0105	0.3525	0.797	0.3615	0.023	0.016	0.0265	0.0155	0.141	0.026	0.068	0.04	0.2125	0.2885	1.3295
P28G	1.917	0.0045	0.365	0.604	0.57	0.021	0.014	0.01	0.028	-0.0145	0.0085	0.023	1.155	0.1685	0.007	1.9035
P29G	0.1025	0.003	0.023	0.085	0.002	0.0055	-0.0015	0.005	0.0015	0.1365	0.006	0.005	2.4835	0.0075	0.001	0.0025
P30G	2.3855	0.1605	2.3	1.2685	0.904	0.3765	-0.0175	1.4895	1.1	1.355	0.0075	0.015	1.683	0.0085	1.909	0.355
P31G	0.034	-0.0025	-0.0035	-0.0015	-0.0045	0.0005	-0.0015	0.026	-0.0035	0.002	-0.0005	-0.003	-0.002	-0.002	-0.005	-0.004
P32G	0.0975	0.0035	1.972	2.3115	1.524	0.0065	-0.0005	0.009	0.004	0.671	0.008	0.5665	0.1	0.0085	0.4505	2.42

## Sheet: Fig. 2f+g
Figure 2
Fig. 2f	NT50 titers		Mouse
SvD	2094.88	88.8012	13922.7	6351.27	4090.85	13268.2	523.31	1036.12	556.385	6820.06	423.565	1108.67	10929.1	4541.76	2535.86	13184.9	1166.92	16	1517.52	16	16	767.47	4257	1676.37	16	625.983	835.762	4220.96	2532.58	1374.82	16	2673.31	471.55	2726.37	478.848	1623.28	1502.71	286.449	273.094	507.254	63.1124	30.912	736.649	2355.78	2587.38	438.225	3579.39	16	14.478
SvG	2189.52	70.1775	1861.92	5313.45	2470.64	16	2031.65	16	4953.41	4228.97	16	4541.12	771.019	368.53	52.0688	16
Fig. 2g	NT50 titers		Human
SvD	353.527	46.6907	20	145.672	151.401	166.174	20	200.753	70.0857	20	93.9601	20	42.7401	20
SvG	1163.7	72.1672	34.764	39.54	216.792	290.528	58.7542	519.756	200.102	50.3292	563.474	18.208	400	12.5
[truncated: 18 more columns]

## Sheet: Fig. 3a+b
Figure 3
Fig. 3a
	% neutralization of SvD
Serum dilution	IgG	IgG+ VD4D/E peptide	IgG + Control peptide	Serum
200	82.88	30.75	79.62	92.61
400	70.66	1.19	81.61	90.31
800	71.57	-14.14	79.22	90.65
1600	63.26	2.3	53.9	71.26
3200	26.76	3.95	21.92	22.65
6400	9.19	7.87	17.16	-6.54
Fig. 3b
SvD NT50 titer	2094.88	88.8012	13922.7	6351.27	4090.85	13268.2	523.31	1036.12	556.385	6820.06	423.565	1108.67	10929.1	4541.76	2535.86	13184.9	1166.92	16	1517.52	16	16	767.47	4257	1676.37	16	625.983	835.762	4220.96	2532.58	1374.82	16	2673.31	471.55	2726.37	478.848	1623.28	1502.71	286.449	273.094	507.254	63.1124	30.912	736.649	2355.78	2587.38	438.225	3579.39	16	14.478
Peptide specific IgG (Abs)	0.848	0.051	1.247	0.705	0.556	1.553	0.08	0.18	0.134	0.904	0.085	0.223	0.669	0.473	0.493	0.797	0.199	0.055	0.146	0.017	0.008	0.207	0.613	0.158	0.01	0.075	0.183	0.474	0.669	0.078	0.011	0.369	0.213	0.272	0.117	0.144	0.829	0.208	0.085	0.076	0.179	0.018	0.091	0.455	0.377	0.204	1.259	0.029	0.01
[truncated: 17 more columns]

## Sheet: Fig.4b
Figure 4
Fig. 4b	Neutralization of SvD
	C.t. SvD NT50 titer
	Human CTH522 specific serum pool	Mouse CTH522 specific serum pool
	652.69	1600.06
	610.015	914.66
	752.235	1225.07

## Sheet: Fig.4c
Figure 4
Fig. 4c
Mouse serum	PID3			PID7
	CTH522	Control		CTH522	Control
	0.6	2.71767		3.02243	3.11561
	0.6	3.72245		0.6	3.18298
	1.75588	2.4014		1.59106	1.79934
	2.11059	2.34635		3.4327	3.61249
	2.45025	2.20952		2.60745	1.51851
	0.6	2.57054		0.6	3.82391
	0.6	1.98227		0.6	2.57403
	0.6	1.75588		0.6	0.6
	0.6	0.778151		0.6	4.12494
	1.73239	0.6		2.30963	0.6
Human serum	PID3			PID7
	CTH522	Control		CTH522	Control
	0.6	2.66745		0.6	2.77159
	2.26245	2.47712		2.98363	2.51455
	0.6	1.59106		1.75588	3.13033
	0.6	2.45939		0.6	2.72997
	0.6	4.04801		2.92737	2.26951
	1.17609	1.07918		2.75815	3.14737
	0.6	2.73719		0.6	3.77949
	0.6	0.6		0.778151	2.56348
	0.6	2.77815		0.6	0.6
	0.6	3.70198		0.6	2.85552

[truncated: 14 more sheets: Fig.4d, Fig.5b, Fig.5c+e, Fig. 5d, Fig. 6b, Fig. 6c, Fig. 6d, Fig. 6e, Fig. 7b, Fig. 7c+d, Fig.7e+f, Fig. 7g, Supplementary Fig. 1, Supplementary Fig. 2]
